# Supplementary material for: Second-order perturbation theory with complete and restricted active space reference functions applied to oligomeric unsaturated hydrocarbons
Source: Royal Society of Chemistry journal article supplement (doi:10.1039/b912607d), 2009-01-01
Supplement: b912607d.pdf [file b912607d.pdf]

Supplementary Material (ESI) for *PCCP*

This journal is © the Owner Societies 2009

## **Second-order Perturbation Theory with Complete and Restricted Active Space Reference Functions Applied to Oligomeric Unsaturated Hydrocarbons**

*Abdul Rehaman Moughal Shahi,<sup>1</sup> Christopher J. Cramer,<sup>2</sup> and Laura Gagliardi\*<sup>1,2</sup>*

<sup>1</sup>Department of Physical Chemistry, University of Geneva, 30, q. E. Ansermet, 1211 Genève, Switzerland

<sup>2</sup>Department of Chemistry and Supercomputing Institute, University of Minnesota, 207 Pleasant St. SE, Minneapolis, Minnesota 55455-0431, USA

**Supporting Information**

Cartesian Coordinates of the systems in study :

Ethene Oligomers :

Monomer

|   |           |           |          |
|---|-----------|-----------|----------|
| C | -0.671081 | 0.000000  | 0.000000 |
| C | 0.671081  | 0.000000  | 0.000000 |
| H | -1.251970 | 0.940593  | 0.000000 |
| H | 1.251970  | 0.940593  | 0.000000 |
| H | -1.251970 | -0.940593 | 0.000000 |
| H | 1.251970  | -0.940593 | 0.000000 |

DIMER

|   |           |           |          |
|---|-----------|-----------|----------|
| C | -1.753076 | -0.639740 | 0.000000 |
| C | 1.753076  | 0.639740  | 0.000000 |
| C | -0.399654 | -0.609577 | 0.000000 |
| C | 0.399654  | 0.609577  | 0.000000 |
| H | -2.346301 | 0.293341  | 0.000000 |

Supplementary Material (ESI) for *PCCP*

This journal is © the Owner Societies 2009

|   |           |           |          |
|---|-----------|-----------|----------|
| H | 2.346301  | -0.293341 | 0.000000 |
| H | -2.311065 | -1.591707 | 0.000000 |
| H | 2.311065  | 1.591707  | 0.000000 |
| H | 0.162215  | -1.563801 | 0.000000 |
| H | -0.162215 | 1.563801  | 0.000000 |

TRIMER

|   |           |           |          |
|---|-----------|-----------|----------|
| C | -2.824392 | -1.283823 | 0.000000 |
| C | 2.824392  | 1.283823  | 0.000000 |
| C | -1.468084 | -1.238958 | 0.000000 |
| C | 1.468084  | 1.238958  | 0.000000 |
| H | -3.427301 | -0.357265 | 0.000000 |
| H | 3.427301  | 0.357265  | 0.000000 |
| H | -3.370938 | -2.242158 | 0.000000 |
| H | 3.370938  | 2.242158  | 0.000000 |
| H | -0.899808 | -2.189302 | 0.000000 |
| H | 0.899808  | 2.189302  | 0.000000 |

Supplementary Material (ESI) for *PCCP*

This journal is © the Owner Societies 2009

|   |           |           |          |
|---|-----------|-----------|----------|
| C | -0.683520 | -0.020769 | 0.000000 |
| C | 0.683520  | 0.020769  | 0.000000 |
| H | -1.243323 | 0.934950  | 0.000000 |
| H | 1.243323  | -0.934950 | 0.000000 |

TETRAMER

|   |           |           |          |
|---|-----------|-----------|----------|
| C | -1.758680 | -0.655031 | 0.000000 |
| C | 1.758680  | 0.655031  | 0.000000 |
| C | -0.387619 | -0.606079 | 0.000000 |
| C | 0.387619  | 0.606079  | 0.000000 |
| H | -2.322251 | 0.298249  | 0.000000 |
| H | 2.322251  | -0.298249 | 0.000000 |
| H | 0.173405  | -1.561007 | 0.000000 |
| H | -0.173405 | 1.561007  | 0.000000 |
| C | 2.534726  | 1.875578  | 0.000000 |
| C | -2.534726 | -1.875578 | 0.000000 |
| C | 3.892056  | 1.929500  | 0.000000 |

Supplementary Material (ESI) for *PCCP*

This journal is © the Owner Societies 2009

|   |           |           |          |
|---|-----------|-----------|----------|
| C | -3.892056 | -1.929500 | 0.000000 |
| H | 1.961281  | 2.822871  | 0.000000 |
| H | -1.961281 | -2.822871 | 0.000000 |
| H | 4.432035  | 2.891484  | 0.000000 |
| H | -4.432035 | -2.891484 | 0.000000 |
| H | 4.500991  | 1.006992  | 0.000000 |
| H | -4.500991 | -1.006992 | 0.000000 |

PENTAMER :

|   |           |           |          |
|---|-----------|-----------|----------|
| C | -0.687972 | -0.026402 | 0.000000 |
| C | 0.687972  | 0.026402  | 0.000000 |
| H | -1.249994 | 0.927744  | 0.000000 |
| H | 1.249994  | -0.927744 | 0.000000 |
| C | 1.457201  | 1.237868  | 0.000000 |
| C | -1.457201 | -1.237868 | 0.000000 |
| C | 2.830172  | 1.292306  | 0.000000 |
| C | -2.830172 | -1.292306 | 0.000000 |

Supplementary Material (ESI) for *PCCP*

This journal is © the Owner Societies 2009

H 0.893894 2.191518 0.000000

H -0.893894 -2.191518 0.000000

H 3.396713 0.340853 0.000000

H -3.396713 -0.340853 0.000000

C 3.600331 2.514851 0.000000

C -3.600331 -2.514851 0.000000

C 4.958134 2.575512 0.000000

C -4.958134 -2.575512 0.000000

H 3.023118 3.459899 0.000000

H -3.023118 -3.459899 0.000000

H 5.493296 3.540142 0.000000

H -5.493296 -3.540142 0.000000

H 5.571492 1.655989 0.000000

H -5.571492 -1.655989 0.000000

HEXAMER

C 0.382191 0.604652 0.000000

C -0.382191 -0.604652 0.000000

Supplementary Material (ESI) for *PCCP*

This journal is © the Owner Societies 2009

|   |           |           |          |
|---|-----------|-----------|----------|
| C | 1.760542  | 0.661229  | 0.000000 |
| C | -1.760542 | -0.661229 | 0.000000 |
| H | -0.180938 | 1.558226  | 0.000000 |
| H | 0.180938  | -1.558226 | 0.000000 |
| H | 2.324218  | -0.291906 | 0.000000 |
| H | -2.324218 | 0.291906  | 0.000000 |
| C | 2.525477  | 1.872920  | 0.000000 |
| C | -2.525477 | -1.872920 | 0.000000 |
| C | 3.899512  | 1.931573  | 0.000000 |
| C | -3.899512 | -1.931573 | 0.000000 |
| H | 1.960116  | 2.825387  | 0.000000 |
| H | -1.960116 | -2.825387 | 0.000000 |
| H | 4.468586  | 0.981638  | 0.000000 |
| H | -4.468586 | -0.981638 | 0.000000 |
| C | 4.665273  | 3.155770  | 0.000000 |
| C | -4.665273 | -3.155770 | 0.000000 |
| C | 6.023272  | 3.221350  | 0.000000 |

Supplementary Material (ESI) for *PCCP*  
This journal is © the Owner Societies 2009

|   |           |           |          |
|---|-----------|-----------|----------|
| C | -6.023272 | -3.221350 | 0.000000 |
| H | 4.085075  | 4.098992  | 0.000000 |
| H | -4.085075 | -4.098992 | 0.000000 |
| H | 6.555406  | 4.187618  | 0.000000 |
| H | -6.555406 | -4.187618 | 0.000000 |
| H | 6.639886  | 2.303984  | 0.000000 |
| H | -6.639886 | -2.303984 | 0.000000 |

SEPTAMER

|   |           |           |          |
|---|-----------|-----------|----------|
| C | -0.690384 | -0.029329 | 0.000000 |
| C | 0.690384  | 0.029329  | 0.000000 |
| H | -1.254054 | 0.923866  | 0.000000 |
| H | 1.254054  | -0.923866 | 0.000000 |
| C | 1.451936  | 1.238238  | 0.000000 |
| C | -1.451936 | -1.238238 | 0.000000 |
| C | 2.831419  | 1.297321  | 0.000000 |
| C | -2.831419 | -1.297321 | 0.000000 |



Supplementary Material (ESI) for *PCCP*

This journal is © the Owner Societies 2009

|   |           |           |          |
|---|-----------|-----------|----------|
| H | 0.887835  | 2.191256  | 0.000000 |
| H | -0.887835 | -2.191256 | 0.000000 |
| H | 3.396440  | 0.345028  | 0.000000 |
| H | -3.396440 | -0.345028 | 0.000000 |
| C | 3.593469  | 2.509889  | 0.000000 |
| C | -3.593469 | -2.509889 | 0.000000 |
| C | 4.967953  | 2.571732  | 0.000000 |
| C | -4.967953 | -2.571732 | 0.000000 |
| H | 3.026341  | 3.461315  | 0.000000 |
| H | -3.026341 | -3.461315 | 0.000000 |
| H | 5.539160  | 1.623120  | 0.000000 |
| H | -5.539160 | -1.623120 | 0.000000 |
| C | -5.730379 | -3.797723 | 0.000000 |
| C | 5.730379  | 3.797723  | 0.000000 |
| C | -7.088424 | -3.867312 | 0.000000 |
| C | 7.088424  | 3.867312  | 0.000000 |
| H | -5.147640 | -4.739399 | 0.000000 |

Supplementary Material (ESI) for *PCCP*  
This journal is © the Owner Societies 2009

|         |           |           |          |
|---------|-----------|-----------|----------|
| H       | 5.147640  | 4.739399  | 0.000000 |
| H       | -7.617292 | -4.835387 | 0.000000 |
| H       | 7.617292  | 4.835387  | 0.000000 |
| H       | -7.707947 | -2.951940 | 0.000000 |
| H       | 7.707947  | 2.951940  | 0.000000 |
| OCTAMER |           |           |          |
| C       | 0.379491  | 0.604069  | 0.000000 |
| C       | -0.379491 | -0.604069 | 0.000000 |
| C       | 1.761511  | 0.664821  | 0.000000 |
| C       | -1.761511 | -0.664821 | 0.000000 |
| H       | -0.184875 | 1.556877  | 0.000000 |
| H       | 0.184875  | -1.556877 | 0.000000 |
| H       | 2.326165  | -0.287762 | 0.000000 |
| H       | -2.326165 | 0.287762  | 0.000000 |
| C       | 2.520702  | 1.874052  | 0.000000 |
| C       | -2.520702 | -1.874052 | 0.000000 |

Supplementary Material (ESI) for *PCCP*

This journal is © the Owner Societies 2009

|   |           |           |          |
|---|-----------|-----------|----------|
| C | 3.900778  | 1.935442  | 0.000000 |
| C | -3.900778 | -1.935442 | 0.000000 |
| H | 1.955412  | 2.826378  | 0.000000 |
| H | -1.955412 | -2.826378 | 0.000000 |
| H | 4.467174  | 0.983984  | 0.000000 |
| H | -4.467174 | -0.983984 | 0.000000 |
| C | 4.660551  | 3.148924  | 0.000000 |
| C | -4.660551 | -3.148924 | 0.000000 |
| C | 6.035252  | 3.213232  | 0.000000 |
| C | -6.035252 | -3.213232 | 0.000000 |
| H | 4.091916  | 4.099452  | 0.000000 |
| H | -4.091916 | -4.099452 | 0.000000 |
| H | 6.608066  | 2.265603  | 0.000000 |
| H | -6.608066 | -2.265603 | 0.000000 |
| C | 6.795415  | 4.440463  | 0.000000 |
| C | -6.795415 | -4.440463 | 0.000000 |
| C | 8.153455  | 4.512486  | 0.000000 |

Supplementary Material (ESI) for *PCCP*  
This journal is © the Owner Societies 2009

|   |           |           |          |
|---|-----------|-----------|----------|
| C | -8.153455 | -4.512486 | 0.000000 |
| H | 6.211029  | 5.381118  | 0.000000 |
| H | -6.211029 | -5.381118 | 0.000000 |
| H | 8.680634  | 5.481480  | 0.000000 |
| H | -8.680634 | -5.481480 | 0.000000 |
| H | 8.774546  | 3.598179  | 0.000000 |
| H | -8.774546 | -3.598179 | 0.000000 |

NONAMER

|   |           |           |          |
|---|-----------|-----------|----------|
| C | -0.691719 | -0.031287 | 0.000000 |
| C | 0.691719  | 0.031287  | 0.000000 |
| H | -1.256683 | 0.921138  | 0.000000 |
| H | 1.256683  | -0.921138 | 0.000000 |
| C | 1.448538  | 1.239253  | 0.000000 |
| C | -1.448538 | -1.239253 | 0.000000 |
| C | 2.831323  | 1.301867  | 0.000000 |
| C | -2.831323 | -1.301867 | 0.000000 |

Supplementary Material (ESI) for *PCCP*  
This journal is © the Owner Societies 2009

|   |           |           |          |
|---|-----------|-----------|----------|
| H | 0.883428  | 2.191630  | 0.000000 |
| H | -0.883428 | -2.191630 | 0.000000 |
| H | 3.396802  | 0.349794  | 0.000000 |
| H | -3.396802 | -0.349794 | 0.000000 |
| C | 3.588686  | 2.511384  | 0.000000 |
| C | -3.588686 | -2.511384 | 0.000000 |
| C | 4.969162  | 2.574471  | 0.000000 |
| C | -4.969162 | -2.574471 | 0.000000 |
| H | 3.022541  | 3.463203  | 0.000000 |
| H | -3.022541 | -3.463203 | 0.000000 |
| H | 5.536447  | 1.623561  | 0.000000 |
| H | -5.536447 | -1.623561 | 0.000000 |
| C | -5.727311 | -3.788499 | 0.000000 |
| C | 5.727311  | 3.788499  | 0.000000 |
| C | -7.102175 | -3.854628 | 0.000000 |
| C | 7.102175  | 3.854628  | 0.000000 |

Supplementary Material (ESI) for *PCCP*

This journal is © the Owner Societies 2009

H -5.157691 -4.738442 0.000000

H 5.157691 4.738442 0.000000

H -7.676128 -2.907708 0.000000

H 7.676128 2.907708 0.000000

C -7.860371 -5.082837 0.000000

C 7.860371 5.082837 0.000000

C -9.218378 -5.157425 0.000000

C 9.218378 5.157425 0.000000

H -7.274530 -6.022601 0.000000

H 7.274530 6.022601 0.000000

H -9.743381 -6.127597 0.000000

H 9.743381 6.127597 0.000000

H -9.841270 -4.244372 0.000000

H 9.841270 4.244372 0.000000

DECAMER

C -1.762226 -0.666914 0.000000

C 1.762226 0.666914 0.000000

Supplementary Material (ESI) for *PCCP*

This journal is © the Owner Societies 2009

|   |           |           |          |
|---|-----------|-----------|----------|
| C | -0.377742 | -0.603513 | 0.000000 |
| C | 0.377742  | 0.603513  | 0.000000 |
| H | -2.327389 | 0.285382  | 0.000000 |
| H | 2.327389  | -0.285382 | 0.000000 |
| H | 0.187228  | -1.555955 | 0.000000 |
| H | -0.187228 | 1.555955  | 0.000000 |
| C | 2.517757  | 1.874579  | 0.000000 |
| C | -2.517757 | -1.874579 | 0.000000 |
| C | 3.901182  | 1.938463  | 0.000000 |
| C | -3.901182 | -1.938463 | 0.000000 |
| H | 1.952215  | 2.826713  | 0.000000 |
| H | -1.952215 | -2.826713 | 0.000000 |
| H | 4.467379  | 0.986826  | 0.000000 |
| H | -4.467379 | -0.986826 | 0.000000 |
| C | -4.656875 | -3.148327 | 0.000000 |
| C | 4.656875  | 3.148327  | 0.000000 |

Supplementary Material (ESI) for *PCCP*

This journal is © the Owner Societies 2009

|   |            |           |          |
|---|------------|-----------|----------|
| C | -6.037701  | -3.213361 | 0.000000 |
| C | 6.037701   | 3.213361  | 0.000000 |
| H | -4.089726  | -4.099556 | 0.000000 |
| H | 4.089726   | 4.099556  | 0.000000 |
| H | -6.606245  | -2.263209 | 0.000000 |
| H | 6.606245   | 2.263209  | 0.000000 |
| C | -6.793755  | -4.428281 | 0.000000 |
| C | 6.793755   | 4.428281  | 0.000000 |
| C | -8.168751  | -4.496756 | 0.000000 |
| C | 8.168751   | 4.496756  | 0.000000 |
| H | -6.222703  | -5.377367 | 0.000000 |
| H | 6.222703   | 5.377367  | 0.000000 |
| H | -8.744222  | -3.550761 | 0.000000 |
| H | 8.744222   | 3.550761  | 0.000000 |
| C | -8.924798  | -5.726090 | 0.000000 |
| C | 8.924798   | 5.726090  | 0.000000 |
| C | -10.282773 | -5.802906 | 0.000000 |



Supplementary Material (ESI) for *PCCP*  
This journal is © the Owner Societies 2009

|   |            |           |          |
|---|------------|-----------|----------|
| C | 10.282773  | 5.802906  | 0.000000 |
| H | -8.337452  | -6.664913 | 0.000000 |
| H | 8.337452   | 6.664913  | 0.000000 |
| H | -10.806359 | -6.773837 | 0.000000 |
| H | 10.806359  | 6.773837  | 0.000000 |
| H | -10.907085 | -4.890816 | 0.000000 |
| H | 10.907085  | 4.890816  | 0.000000 |

Acetylene Oligomers :

MONOMER

|   |          |          |           |
|---|----------|----------|-----------|
| C | 0.000000 | 0.000000 | -0.609835 |
| C | 0.000000 | 0.000000 | 0.609835  |
| H | 0.000000 | 0.000000 | -1.693089 |
| H | 0.000000 | 0.000000 | 1.693089  |

DIMER

|   |           |          |          |
|---|-----------|----------|----------|
| C | -1.897933 | 0.000000 | 0.000000 |
| C | 1.897933  | 0.000000 | 0.000000 |

Supplementary Material (ESI) for *PCCP*

This journal is © the Owner Societies 2009

|   |           |          |          |
|---|-----------|----------|----------|
| C | -0.680607 | 0.000000 | 0.000000 |
| C | 0.680607  | 0.000000 | 0.000000 |
| H | -2.967885 | 0.000000 | 0.000000 |
| H | 2.967885  | 0.000000 | 0.000000 |

TRIMER

|   |          |          |           |
|---|----------|----------|-----------|
| C | 0.000000 | 0.000000 | -0.615404 |
| C | 0.000000 | 0.000000 | 0.615404  |
| C | 0.000000 | 0.000000 | 1.965386  |
| C | 0.000000 | 0.000000 | -1.965386 |
| C | 0.000000 | 0.000000 | 3.186011  |
| C | 0.000000 | 0.000000 | -3.186011 |
| H | 0.000000 | 0.000000 | 4.255850  |
| H | 0.000000 | 0.000000 | -4.255850 |

TETRAMER

|   |          |          |          |
|---|----------|----------|----------|
| C | 0.000000 | 0.000000 | 0.668876 |
|---|----------|----------|----------|

Supplementary Material (ESI) for *PCCP*

This journal is © the Owner Societies 2009

|   |          |          |           |
|---|----------|----------|-----------|
| C | 0.000000 | 0.000000 | -0.668876 |
| C | 0.000000 | 0.000000 | 1.904640  |
| C | 0.000000 | 0.000000 | -1.904640 |
| C | 0.000000 | 0.000000 | 3.252015  |
| C | 0.000000 | 0.000000 | -3.252015 |
| C | 0.000000 | 0.000000 | 4.474504  |
| C | 0.000000 | 0.000000 | -4.474504 |
| H | 0.000000 | 0.000000 | 5.544598  |
| H | 0.000000 | 0.000000 | -5.544598 |

PENTAMER

|   |          |          |           |
|---|----------|----------|-----------|
| C | 0.000000 | 0.000000 | 1.947804  |
| C | 0.000000 | 0.000000 | -1.947804 |
| C | 0.000000 | 0.000000 | 3.183947  |
| C | 0.000000 | 0.000000 | -3.183947 |
| C | 0.000000 | 0.000000 | 4.526629  |
| C | 0.000000 | 0.000000 | -4.526629 |

Supplementary Material (ESI) for *PCCP*

This journal is © the Owner Societies 2009

|   |          |          |           |
|---|----------|----------|-----------|
| C | 0.000000 | 0.000000 | 5.749269  |
| C | 0.000000 | 0.000000 | -5.749269 |
| C | 0.000000 | 0.000000 | 0.619532  |
| C | 0.000000 | 0.000000 | -0.619532 |
| H | 0.000000 | 0.000000 | 6.818625  |
| H | 0.000000 | 0.000000 | -6.818625 |

Phenylene Oligomers :

MONOMER

|   |           |           |          |
|---|-----------|-----------|----------|
| C | 1.209918  | -0.698488 | 0.000000 |
| C | -1.209918 | -0.698488 | 0.000000 |
| C | 1.209918  | 0.698488  | 0.000000 |
| C | -1.209918 | 0.698488  | 0.000000 |
| C | 0.000000  | -1.396832 | 0.000000 |
| C | 0.000000  | 1.396832  | 0.000000 |
| H | 0.000000  | -2.487835 | 0.000000 |
| H | 0.000000  | 2.487835  | 0.000000 |
| H | 2.154726  | -1.244157 | 0.000000 |

Supplementary Material (ESI) for *PCCP*  
This journal is © the Owner Societies 2009

|   |           |           |          |
|---|-----------|-----------|----------|
| H | -2.154726 | -1.244157 | 0.000000 |
| H | 2.154726  | 1.244157  | 0.000000 |
| H | -2.154726 | 1.244157  | 0.000000 |

DIMER

|   |           |           |           |
|---|-----------|-----------|-----------|
| C | 1.150756  | 0.380265  | -1.473857 |
| C | -1.150756 | -0.380265 | -1.473857 |
| C | -1.150756 | 0.380265  | 1.473857  |
| C | 1.150756  | -0.380265 | 1.473857  |
| C | 0.000000  | 0.000000  | -0.743906 |
| C | 0.000000  | 0.000000  | 0.743906  |
| C | -1.151159 | -0.381139 | -2.876312 |
| C | 1.151159  | 0.381139  | -2.876312 |
| C | 1.151159  | -0.381139 | 2.876312  |
| C | -1.151159 | 0.381139  | 2.876312  |
| C | 0.000000  | 0.000000  | -3.585130 |
| C | 0.000000  | 0.000000  | 3.585130  |

Supplementary Material (ESI) for *PCCP*  
This journal is © the Owner Societies 2009

|   |           |           |           |
|---|-----------|-----------|-----------|
| H | -2.058374 | -0.691306 | -3.421080 |
| H | 2.058374  | 0.691306  | -3.421080 |
| H | 2.058374  | -0.691306 | 3.421080  |
| H | -2.058374 | 0.691306  | 3.421080  |
| H | 2.052276  | 0.708028  | -0.930702 |
| H | -2.052276 | -0.708028 | -0.930702 |
| H | -2.052276 | 0.708028  | 0.930702  |
| H | 2.052276  | -0.708028 | 0.930702  |
| H | 0.000000  | 0.000000  | -4.687516 |
| H | 0.000000  | 0.000000  | 4.687516  |

TRIMER

|   |           |           |           |
|---|-----------|-----------|-----------|
| C | 0.000000  | 2.922319  | 0.000000  |
| C | 0.000000  | -2.922319 | 0.000000  |
| C | 0.986876  | 3.652825  | -0.703561 |
| C | -0.986876 | -3.652825 | -0.703561 |
| C | -0.986876 | 3.652825  | 0.703561  |

Supplementary Material (ESI) for *PCCP*  
This journal is © the Owner Societies 2009

|   |           |           |           |
|---|-----------|-----------|-----------|
| C | 0.986876  | -3.652825 | 0.703561  |
| C | 0.987277  | 5.055078  | -0.704038 |
| C | -0.987277 | -5.055078 | -0.704038 |
| C | -0.987277 | 5.055078  | 0.704038  |
| C | 0.987277  | -5.055078 | 0.704038  |
| C | 0.000000  | 5.763876  | 0.000000  |
| C | 0.000000  | -5.763876 | 0.000000  |
| H | 1.751538  | 3.110719  | -1.283494 |
| H | -1.751538 | -3.110719 | -1.283494 |
| H | -1.751538 | 3.110719  | 1.283494  |
| H | 1.751538  | -3.110719 | 1.283494  |
| H | 1.762212  | 5.599739  | -1.268487 |
| H | -1.762212 | -5.599739 | -1.268487 |
| H | -1.762212 | 5.599739  | 1.268487  |
| H | 1.762212  | -5.599739 | 1.268487  |
| H | 0.000000  | 6.866273  | 0.000000  |

Supplementary Material (ESI) for *PCCP*

This journal is © the Owner Societies 2009

|   |           |           |           |
|---|-----------|-----------|-----------|
| H | 0.000000  | -6.866273 | 0.000000  |
| C | 0.000000  | 1.436615  | 0.000000  |
| C | 0.000000  | -1.436615 | 0.000000  |
| C | 1.207339  | 0.699668  | -0.000351 |
| C | -1.207339 | -0.699668 | -0.000351 |
| C | -1.207339 | 0.699668  | 0.000351  |
| C | 1.207339  | -0.699668 | 0.000351  |
| H | 2.170799  | 1.235110  | 0.017871  |
| H | -2.170799 | -1.235110 | 0.017871  |
| H | -2.170799 | 1.235110  | -0.017871 |
| H | 2.170799  | -1.235110 | -0.017871 |



**Total Energies and Weights**

CASPT2/RASPT2 , CASSCF/RASSCF energies and weights for the various oligomers in study.

*CASPT2 & RASPT2 Total Energies (in a.u.) :*

| Acetylene |           | CASPT2     | RASPT2     |            |            |
|-----------|-----------|------------|------------|------------|------------|
|           |           |            | (ae,ao)/2  | (ae,ao)/3  | (ae,ao)/4  |
| one       | Neutral   | -77.15084  | -77.14952  | -77.14952  | -77.15086  |
|           | Cation    | -76.73593  | -76.73593  | -76.73593  | -76.73593  |
|           | Exc.state | -76.88169  | -76.88077  | -76.88173  | -76.88173  |
| two       | Neutral   | -153.13734 | -153.13027 | -153.13973 | -153.13729 |
|           | Cation    | -152.76913 | -152.76324 | -152.77424 | -152.76930 |
|           | Exc.state | -152.93576 | -152.91489 | -152.93428 | -152.94039 |
| three     | Neutral   | -229.12494 | -229.10868 | -229.11949 | -229.12421 |
|           | Cation    | -228.78234 | -228.76524 | -228.77874 | -228.78199 |
|           | Exc.state | -228.96013 | -228.89951 | -228.95305 | -228.96183 |
| four      | Neutral   | -305.11365 | -305.08541 | -305.09862 | -305.11175 |
|           | Cation    | -304.78792 | -304.75706 | -304.77648 | -304.78648 |
|           | Exc.state | -304.97215 | -304.87821 | -304.95447 | -304.97160 |
| five      | Neutral   | NP         | -381.07742 | -381.09501 | -381.10675 |

Supplementary Material (ESI) for *PCCP*

This journal is © the Owner Societies 2009

|  |           |    |            |            |            |
|--|-----------|----|------------|------------|------------|
|  | Cation    | NP | -380.76031 | -380.78223 | -380.79020 |
|  | Exc.state | NP | -380.86787 | -380.96490 | -380.98191 |

*CASSCF & RASSCF Total Energies (in a.u)*

| Acetylene |           | CASSCF     | RASSCF     |            |            |
|-----------|-----------|------------|------------|------------|------------|
|           |           |            | (ae,ao)/2  | (ae,ao)/3  | (ae,ao)/4  |
| one       | Neutral   | -76.91838  | -76.91558  | -76.91558  | -76.91839  |
|           | Cation    | -76.53540  | -76.53540  | -76.53540  | -76.53540  |
|           | Exc.state | -76.62167  | -76.61806  | -76.62169  | -76.62169  |
| two       | Neutral   | -152.69358 | -152.68094 | -152.68649 | -152.69305 |
|           | Cation    | -152.34913 | -152.33803 | -152.34651 | -152.34890 |
|           | Exc.state | -152.45382 | -152.32067 | -152.44989 | -152.45306 |
| three     | Neutral   | -228.46763 | -228.43893 | -228.44734 | -228.46525 |
|           | Cation    | -228.14629 | -228.11652 | -228.13043 | -228.14417 |
|           | Exc.state | -228.26589 | -228.16314 | -228.24943 | -228.25857 |
| four      | Neutral   | -304.24174 | -304.19225 | -304.20321 | -304.23573 |
|           | Cation    | -303.93556 | -303.88307 | -303.90328 | -303.92941 |
|           | Exc.state | -304.06355 | -303.89872 | -304.02867 | -304.04525 |
| five      | Neutral   | NP         | -379.90083 | -379.90926 | -379.94200 |

Supplementary Material (ESI) for *PCCP*

This journal is © the Owner Societies 2009

|  |           |    |            |            |            |
|--|-----------|----|------------|------------|------------|
|  | Cation    | NP | -379.60334 | -379.62351 | -379.65312 |
|  | Exc.state | NP | -379.61221 | -379.75772 | -379.77790 |

*CASSCF & RASSCF Weights :*

| Acetylene |           | CASSCF  | RASSCF    |           |           |
|-----------|-----------|---------|-----------|-----------|-----------|
|           |           |         | (ae,ao)/2 | (ae,ao)/3 | (ae,ao)/4 |
| one       | Neutral   | 0.92909 | 0.92862   | 0.92862   | 0.92908   |
|           | Cation    | 0.93978 | 0.93978   | 0.93978   | 0.93978   |
|           | Exc.state | 0.91449 | 0.91340   | 0.91449   | 0.91449   |
| two       | Neutral   | 0.87459 | 0.87262   | 0.86781   | 0.87      |
|           | Cation    | 0.88047 | 0.87821   | 0.87457   | 0.88024   |
|           | Exc.state | 0.83429 | 0.54385   | 0.84450   | 0.84854   |
| three     | Neutral   | 0.82491 | 0.82042   | 0.81744   | 0.82425   |
|           | Cation    | 0.82378 | 0.82427   | 0.82291   | 0.82854   |
|           | Exc.state | 0.79939 | 0.76057   | 0.77232   | 0.80050   |
| four      | Neutral   | 0.78010 | 0.77269   | 0.76925   | 0.77845   |

Supplementary Material (ESI) for *PCCP*

This journal is © the Owner Societies 2009

|      |           |         |         |         |         |
|------|-----------|---------|---------|---------|---------|
|      | Cation    | 0.78371 | 0.77556 | 0.77384 | 0.78155 |
|      | Exc.state | 0.75946 | 0.76087 | 0.60492 | 0.76548 |
| five | Neutral   | NP      | 0.70751 | 0.70321 | 0.71341 |
|      | Cation    | NP      | 0.71346 | 0.68885 | 0.71346 |
|      | Exc.state | NP      | 0.65392 | 0.69550 | 0.70692 |

| Phenylene |           | CASPT2     | RASPT2     |            |            |
|-----------|-----------|------------|------------|------------|------------|
|           |           |            | (ae,ao)/2  | (ae,ao)/3  | (ae,ao)/4  |
| one       | Neutral   | -231.72045 | -231.72014 | -231.72048 | -231.72048 |
|           | Cation    | -231.37224 | -231.37166 | -231.37787 | -231.37223 |
|           | Exc.state | -231.53918 | -231.52957 | -231.53906 | -231.53934 |
| two       | Neutral   | -462.26953 | -462.26946 | -462.27755 | -462.27075 |
|           | Cation    | -461.95929 | -461.95877 | -461.96517 | -461.96026 |
|           | Exc.state | -462.10869 | -462.06312 | -462.09896 | -462.10270 |
| .         | Neutral   | NP         | -692.82957 | -692.83762 | -692.83120 |

Supplementary Material (ESI) for *PCCP*

This journal is © the Owner Societies 2009

|  |           |    |            |            |            |
|--|-----------|----|------------|------------|------------|
|  | Cation    | NP | -692.53638 | -692.54563 | -692.53816 |
|  | Exc.state | NP | -692.61868 | -692.66201 | -692.66677 |

| Phenylene |           | CASSCF     | RASSCF     |            |            |
|-----------|-----------|------------|------------|------------|------------|
|           |           |            | (ae,ao)/2  | (ae,ao)/3  | (ae,ao)/4  |
| one       | Neutral   | -230.86008 | -230.85495 | -230.85607 | -230.86004 |
|           | Cation    | -230.54844 | -230.54496 | -230.54800 | -230.54844 |
|           | Exc.state | -230.67748 | -230.65263 | -230.67254 | -230.67723 |
| two       | Neutral   | -460.55589 | -460.53384 | -460.53954 | -460.55402 |
|           | Cation    | -460.27140 | -460.25056 | -460.26019 | -460.26994 |

Supplementary Material (ESI) for *PCCP*

This journal is © the Owner Societies 2009

|       |           |            |            |            |            |
|-------|-----------|------------|------------|------------|------------|
|       | Exc.state | -460.37977 | -460.28463 | -460.35028 | -460.37085 |
| three | Neutral   | NP         | -690.17888 | -690.18439 | -690.20427 |
|       | Cation    | NP         | -689.92904 | -689.93723 | -689.96044 |
|       | Exc.state | NP         | -689.87858 | -689.96858 | -689.97763 |

*CASSCF & RASSCF Weights :*

| Phenylene |           | CASSCF  | RASSCF    |           |           |
|-----------|-----------|---------|-----------|-----------|-----------|
|           |           |         | (ae,ao)/2 | (ae,ao)/3 | (ae,ao)/4 |
| one       | Neutral   | 0.78099 | 0.77942   | 0.77960   | 0.78096   |
|           | Cation    | 0.79116 | 0.79004   | 0.78710   | 0.79117   |
|           | Exc.state | 0.77074 | 0.76994   | 0.77006   | 0.77073   |

Supplementary Material (ESI) for *PCCP*

This journal is © the Owner Societies 2009

|       |           |         |         |         |         |
|-------|-----------|---------|---------|---------|---------|
| two   | Neutral   | 0.63935 | 0.63367 | 0.63113 | 0.63849 |
|       | Cation    | 0.64197 | 0.63624 | 0.63585 | 0.64119 |
|       | Exc.state | 0.61123 | 0.55179 | 0.62527 | 0.62846 |
| three | Neutral   | NP      | 0.52453 | 0.52273 | 0.52951 |
|       | Cation    | NP      | 0.52794 | 0.52900 | 0.53458 |
|       | Exc.state | NP      | 0.50513 | 0.50762 | 0.51177 |

*CASPT2 & RASPT2 Total Energies (in a.u.) :*

| Ethylene |           | CASPT2    | RASPT2    |           |           |
|----------|-----------|-----------|-----------|-----------|-----------|
|          |           |           | (ae,ao)/2 | (ae,ao)/3 | (ae,ao)/4 |
| one      | Neutral   | -78.39535 | -78.39535 | CND       | CND       |
|          | Cation    | -78.01017 | CND       | CND       | CND       |
|          | Exc.state | -78.09293 | -78.09293 | CND       | CND       |

Supplementary Material (ESI) for *PCCP*

This journal is © the Owner Societies 2009

|       |           |            |            |            |            |
|-------|-----------|------------|------------|------------|------------|
| two   | Neutral   | -155.62565 | -155.62883 | -155.63727 | -155.62565 |
|       | Cation    | -155.28845 | -155.28843 | -155.28843 | -155.28843 |
|       | Exc.state | -155.39444 | -155.40024 | -155.40154 | -155.39381 |
| three | Neutral   | -232.85370 | -232.85368 | -232.86622 | -232.85375 |
|       | Cation    | -232.55301 | -232.56098 | -232.56118 | -232.55325 |
|       | Exc.state | -232.66299 | -232.66147 | -232.66839 | -232.66579 |
| four  | Neutral   | -310.08664 | -310.08435 | -310.09568 | -310.08688 |
|       | Cation    | -309.80427 | -309.80355 | -309.81123 | -309.80423 |
|       | Exc.state | -309.92876 | -309.91016 | -309.92764 | -309.93138 |
| Five  | Neutral   | -387.31590 | -387.31432 | -387.32503 | -387.31641 |
|       | Cation    | -387.04711 | -387.04657 | -387.05448 | -387.04707 |
|       | Exc.state | -387.18203 | -387.15877 | -387.17904 | -387.18271 |
| Six   | Neutral   | -464.54852 | -464.54309 | -464.55096 | -464.54982 |
|       | Cation    | -464.28980 | -464.28718 | -464.29470 | -464.29094 |
|       | Exc.state | -464.42826 | -464.38287 | -464.41070 | -464.43059 |
| Seven | Neutral   | -541.77941 | -541.77416 | -541.78397 | -541.78084 |
|       | Cation    | -541.52677 | -541.52499 | -541.53244 | -541.52902 |
|       | Exc.state | -464.42826 | -541.62027 | -541.65499 | -541.62027 |
| Eight | Neutral   | NP         | -619.00122 | -619.00923 | -619.01384 |



Supplementary Material (ESI) for *PCCP*

This journal is © the Owner Societies 2009

|      |           |    |            |            |            |
|------|-----------|----|------------|------------|------------|
|      | Cation    | NP | -618.76035 | -618.76942 | -618.76901 |
|      | Exc.state | NP | -618.83889 | -618.88151 | -618.91226 |
| Nine | Neutral   | NP | -696.23241 | -696.24240 | -696.24493 |
|      | Cation    | NP | -695.99555 | -696.00534 | -696.00408 |
|      | Exc.state | NP | -696.07487 | -696.12257 | -696.15620 |
| Ten  | Neutral   | NP | -773.45863 | -773.46686 | -773.47829 |
|      | Cation    | NP | -773.18141 | -773.19422 | -773.20670 |
|      | Exc.state | NP | -773.28607 | -773.34976 | -773.38751 |

| Ethylene |           | CASSCF     | RASSCF     |            |            |
|----------|-----------|------------|------------|------------|------------|
|          |           |            | (ae,ao)/2  | (ae,ao)/3  | (ae,ao)/4  |
| one      | Neutral   | -78.09233  | -78.09233  | CND        | CND        |
|          | Cation    | -77.73326  | CND        | CND        | CND        |
|          | Exc.state | -77.76910  | -77.76910  | CND        | CND        |
| two      | Neutral   | -155.03486 | -155.03315 | -155.03486 | -155.03486 |
|          | Cation    | -154.72353 | -154.72353 | -154.72353 | -154.72353 |
|          | Exc.state | -154.74988 | -154.74988 | -154.74988 | -154.74988 |

Supplementary Material (ESI) for *PCCP*

This journal is © the Owner Societies 2009

|       |           |            |            |             |            |
|-------|-----------|------------|------------|-------------|------------|
| three | Neutral   | -231.95208 | -231.94948 | -231.951753 | -231.95207 |
|       | Cation    | -231.69052 | -231.68959 | -231.69167  | -231.69173 |
|       | Exc.state | -231.73451 | -231.72743 | -231.73427  | -231.73451 |
| four  | Neutral   | -308.92010 | -308.90769 | -308.91215  | -308.91955 |
|       | Cation    | -308.65811 | -308.65023 | -308.65570  | -308.65793 |
|       | Exc.state | -308.75021 | -308.69874 | -308.72944  | -308.74840 |
| Five  | Neutral   | -385.83643 | -385.82370 | -385.82789  | -385.83581 |
|       | Cation    | -385.59997 | -385.58769 | -385.59500  | -385.59945 |
|       | Exc.state | -385.67752 | -385.62106 | -385.65585  | -385.67525 |
| Six   | Neutral   | -462.80492 | -462.77639 | -462.78162  | -462.80211 |
|       | Cation    | -462.56251 | -462.54102 | -462.55154  | -462.56102 |
|       | Exc.state | -462.67301 | -462.56466 | -462.61988  | -462.66235 |
| Seven | Neutral   | -539.71938 | -539.69122 | -539.69657  | -539.71659 |
|       | Cation    | -539.49667 | -539.46979 | -539.48135  | -539.49419 |
|       | Exc.state | -539.59312 | -539.48086 | -539.54041  | -539.58170 |
| Eight | Neutral   | NP         | -616.64095 | -616.64711  | -619.01384 |
|       | Cation    | NP         | -616.41816 | -616.43179  | -616.45295 |
|       | Exc.state | NP         | -616.41321 | -616.49411  | -616.55320 |
| Nine  | Neutral   | NP         | -693.55562 | -693.56210  | -693.59632 |

Supplementary Material (ESI) for *PCCP*

This journal is © the Owner Societies 2009

|     |           |    |            |            |            |
|-----|-----------|----|------------|------------|------------|
|     | Cation    | NP | -696.00408 | -693.35690 | -693.37998 |
|     | Exc.state | NP | -693.32645 | -693.41135 | -693.46863 |
| Ten | Neutral   | NP | -770.50216 | -770.50905 | -770.55939 |
|     | Cation    | NP | -770.23332 | -770.25147 | -770.29513 |
|     | Exc.state | NP | -770.25342 | -770.35953 | -770.43110 |

| Ethylene |           | CASSCF  | RASSCF    |           |           |
|----------|-----------|---------|-----------|-----------|-----------|
|          |           |         | (ae,ao)/2 | (ae,ao)/3 | (ae,ao)/4 |
| one      | Neutral   | 0.91078 | 0.91078   | CND       | CND       |
|          | Cation    | 0.91758 | CND       | CND       | CND       |
|          | Exc.state | 0.89242 | 0.89242   | CND       | CND       |
| two      | Neutral   | 0.83754 | 0.83439   | 0.82780   | 0.83754   |
|          | Cation    | 0.84440 | 0.84441   | 0.84441   | 0.84441   |
|          | Exc.state | 0.80372 | 0.79706   | 0.79268   | 0.80563   |
| three    | Neutral   | 0.76648 | 0.76543   | 0.75698   | 0.76642   |
|          | Cation    | 0.77762 | 0.77086   | 0.77108   | 0.77779   |
|          | Exc.state | 0.74552 | 0.73086   | 0.73938   | 0.73779   |

Supplementary Material (ESI) for *PCCP*

This journal is © the Owner Societies 2009

|       |           |         |         |         |         |
|-------|-----------|---------|---------|---------|---------|
| four  | Neutral   | 0.72217 | 0.71913 | 0.71300 | 0.72191 |
|       | Cation    | 0.72613 | 0.72364 | 0.72098 | 0.72616 |
|       | Exc.state | 0.69126 | 0.69829 | 0.68300 | 0.69157 |
| Five  | Neutral   | 0.66799 | 0.66463 | 0.65950 | 0.66759 |
|       | Cation    | 0.67498 | 0.67133 | 0.66963 | 0.67495 |
|       | Exc.state | 0.64685 | 0.64393 | 0.64243 | 0.67211 |
| Six   | Neutral   | 0.63440 | 0.62865 | 0.62643 | 0.63322 |
|       | Cation    | 0.63669 | 0.63139 | 0.63113 | 0.63585 |
|       | Exc.state | 0.62009 | 0.58860 | 0.54204 | 0.61923 |
| Seven | Neutral   | 0.59149 | 0.58618 | 0.58284 | 0.59031 |
|       | Cation    | 0.59650 | 0.59010 | 0.59013 | 0.59514 |
|       | Exc.state | 0.56853 | 0.59447 | 0.53309 | 0.59653 |
| Eight | Neutral   | NP      | 0.55741 | 0.55591 | 0.56292 |
|       | Cation    | NP      | 0.55898 | 0.55916 | 0.56465 |
|       | Exc.state | NP      | 0.54616 | 0.57038 | 0.56569 |
| Nine  | Neutral   | NP      | 0.52360 | 0.52099 | 0.52857 |
|       | Cation    | NP      | 0.52586 | 0.52611 | 0.53137 |
|       | Exc.state | NP      | 0.50304 | 0.51168 | 0.50055 |
| Ten   | Neutral   | NP      | 0.50003 | 0.49894 | 0.50585 |

Supplementary Material (ESI) for *PCCP*

This journal is © the Owner Societies 2009

|  |           |    |         |         |         |
|--|-----------|----|---------|---------|---------|
|  | Cation    | NP | 0.49858 | 0.49892 | 0.50542 |
|  | Exc.state | NP | 0.48878 | 0.49248 | 0.47229 |

*DFT Total Energies (in a.u) :*

| Ethene | Neutral    | Cation     |
|--------|------------|------------|
| One    | -78.49894  | -78.11964  |
| Two    | -155.82611 | -155.49986 |
| Three  | -233.15547 | -232.60459 |
| Four   | -310.48571 | -310.22019 |
| Five   | -387.81637 | -387.56610 |
| Six    | -465.14727 | -464.90844 |
| Seven  | -542.47830 | -542.24847 |
| Eight  | -619.80943 | -619.58688 |
| Nine   | -697.14064 | -696.92398 |
| Ten    | -774.47188 | -774.26040 |

| Acetylene | Neutral    | Cation     |
|-----------|------------|------------|
| One       | -77.25010  | -76.83684  |
| Two       | -153.34006 | -152.98026 |
| Three     | -229.43115 | -229.10288 |
| Four      | -305.52825 | -305.21746 |
| Five      | -381.62388 | -381.32847 |

| Phenylene | Neutral    | Cation     |
|-----------|------------|------------|
| One       | -232.01475 | -231.68029 |
| Two       | -462.84638 | -462.56088 |

Supplementary Material (ESI) for *PCCP*

This journal is © the Owner Societies 2009

|       |            |            |
|-------|------------|------------|
| Three | -693.67915 | -693.41621 |
|-------|------------|------------|
